# Supplementary material for: Video-based long-term follow up of musician’s dystonia in pianists reveals similar improvements following different treatment strategies: a retrospective observational study
Source: J Clin Mov Disord. 2022 Jan 25;7(Suppl 1):10. doi: 10.1186/s40734-021-00092-3 (PMC8787894; doi:10.1186/s40734-021-00092-3)
Supplement: Supplementary file 4 — Additional file 4. Informative priors placed on parameter estimates for model m4airr (see Additional file 6). [file 40734_2021_92_MOESM4_ESM.csv]

prior	class	coef	group
normal(0, 2)	b
normal(0, 2)	b	Duration_decadesC
normal(0, 2)	b	Intercept
normal(0, 2)	b	TherapyBTX
normal(0, 2)	b	TherapyBTX_RTR
normal(0, 2)	b	TherapyBTX_RTR_TRHX
normal(0, 2)	b	TherapyBTX_TRHX
normal(0, 2)	b	TherapyRTR
normal(0, 2)	b	TherapyRTR_TRHX
normal(0, 2)	b	TherapyTRHX
normal(0, 2)	b	Time1
normal(0, 2)	b	Time1:TherapyBTX
normal(0, 2)	b	Time1:TherapyBTX_RTR
normal(0, 2)	b	Time1:TherapyBTX_RTR_TRHX
normal(0, 2)	b	Time1:TherapyBTX_TRHX
normal(0, 2)	b	Time1:TherapyRTR
normal(0, 2)	b	Time1:TherapyRTR_TRHX
normal(0, 2)	b	Time1:TherapyTRHX
lkj_corr_cholesky(2)	L
lkj_corr_cholesky(2)	L		Code
gamma(0.01 0.01)	phi
normal(0, 0.1)	sd
normal(0, 0.1)	sd		Code
normal(0, 0.1)	sd	Duration_decadesC	Code
normal(0, 0.1)	sd	Intercept	Code
normal(0, 0.1)	sd	Time1	Code
normal(0, 0.1)	sd		Therapy
normal(0, 0.1)	sd	Intercept	Therapy
